# Supplementary material for: Fabrication of C3N4 ultrathin flakes by mechanical grind method with enhanced photocatalysis and photoelectrochemical performance
Source: Royal Society of Chemistry journal article supplement (doi:10.1039/c6ra05524a), 2016-01-01
Supplement: c6ra05524a1.pdf [file c6ra05524a1.pdf]

Support Information of “Fabrication of large-scaled  $C_3N_4$  ultrathin flake by mechanical grind method with enhanced photocatalysis performance”

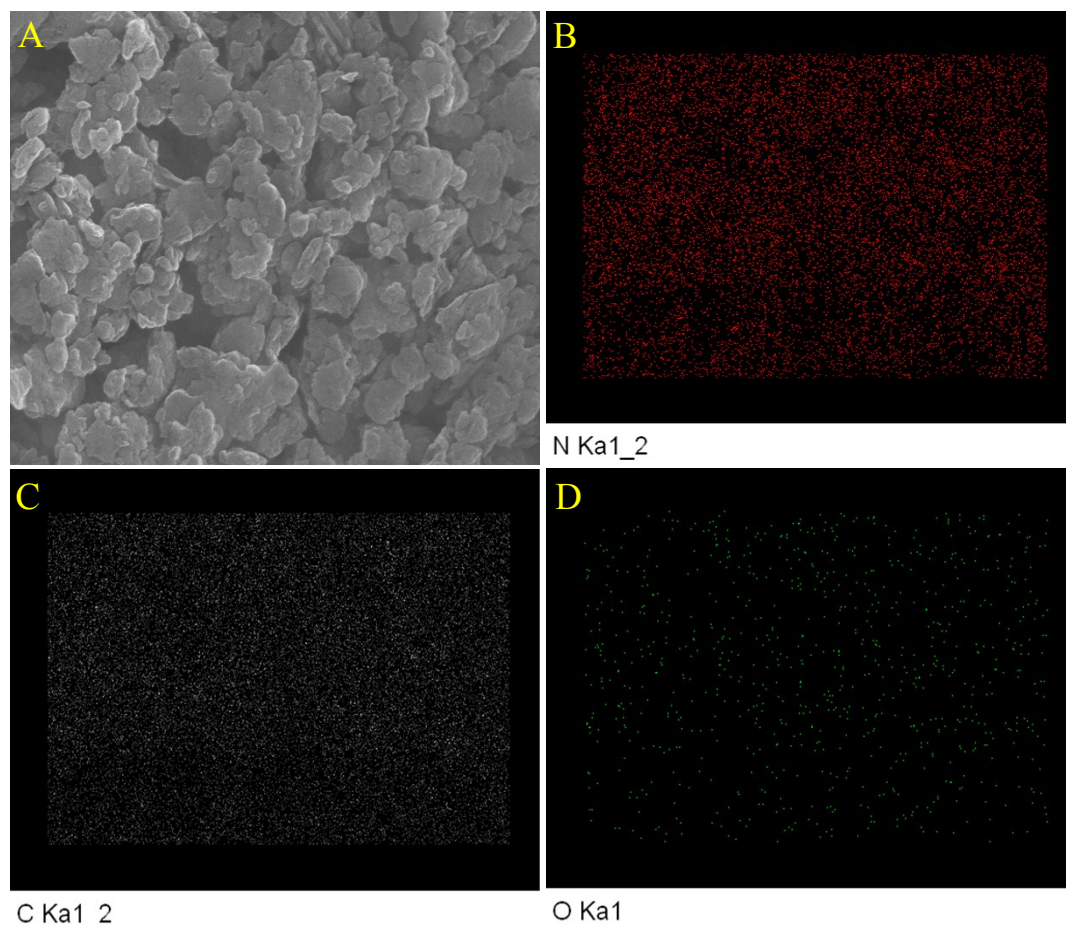

Figure S1. SEM element mapping of UF-CN, (A) SEM image of the scanned area; (B) N element; (C) C element; (D) O element.

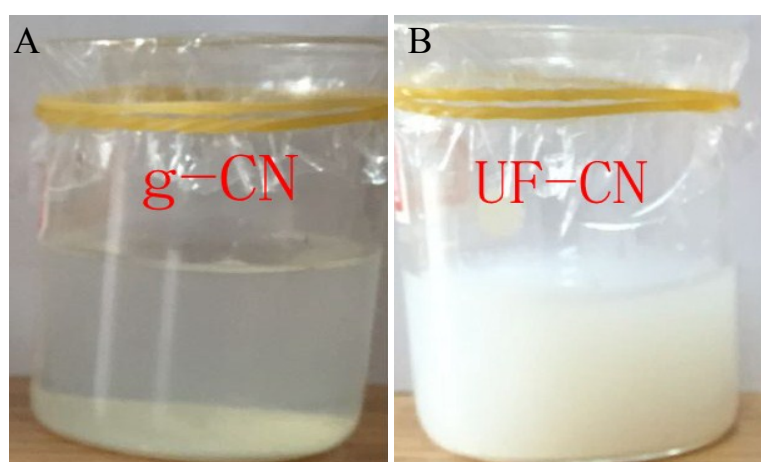

Figure S2. Photographs of the ultrasonic dispersed (A) g-CN and (B) UF-CN after 3 days resting (0.02 g powder dispersed in 20 mL water).

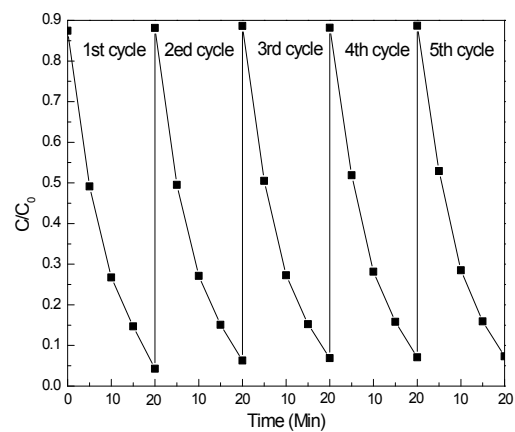

Figure S3. Photocatalytic RhB degradation stability of UF-CN.
